# Supplementary material for: AK-I-190, a New Catalytic Inhibitor of Topoisomerase II with Anti-Proliferative and Pro-Apoptotic Activity on Androgen-Negative Prostate Cancer Cells
Source: MDPI journal article supplement (doi:10.3390/ijms222011246), 2021-10-18
Supplement: s1 [file s1]

# Supplementary Materials

## AK-I-190, a New Catalytic Inhibitor of Topoisomerase II with Anti-Proliferative and Pro- Apoptotic Activity on Androgen-negative Prostate Cancer Cells

*Kyung-Hwa Jeon<sup>1,†</sup>, Seojeong Park<sup>1,†</sup>, Hae Jin Jang<sup>1</sup>, Soo-Yeon Hwang<sup>1</sup>,  
Aarajana Shrestha<sup>2</sup>, Eung-Seok Lee<sup>2</sup>, and Youngjoo Kwon<sup>1,\*</sup>*

<sup>1</sup> College of Pharmacy, Graduate School of Pharmaceutical Sciences, Ewha Womans University, Seoul 03760, Korea; kjeon@ewha.ac.kr (K.-H.J.); tyfpzk@naver.com (S.P.); kate0915@hanmail.net (H.J.J.); hilarious06@naver.com (S.-Y.H.)

<sup>2</sup> College of Pharmacy, Yeungnam University, Gyeongsan 38541, Korea; aarajana90@gmail.com (A.S.)

\*Correspondence: ykwon@ewha.ac.kr (Y.K.)

<sup>†</sup>Authors are equal contributors.

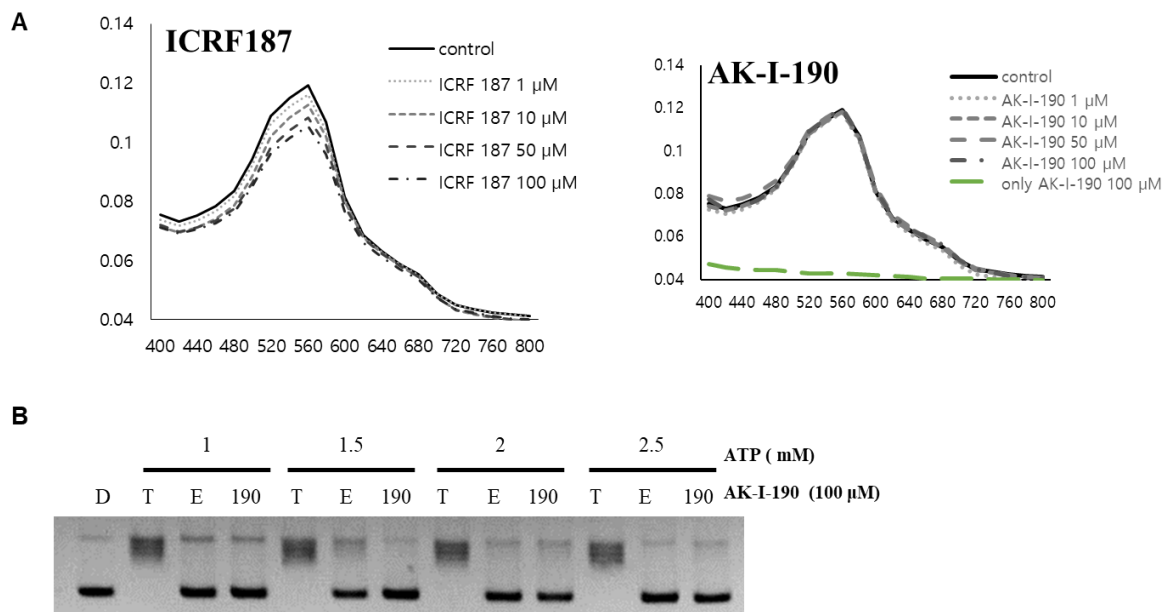

**Supplementary Figure S1. Evaluation of mechanism of AK-I-190.** (A) Metal chelating ability of AK-I-190 was assessed using Eriochrome Black T (EBT). AK-I-190 did not change the absorbance, whereas ICRF187, a metal chelating topoisomerase II inhibitor, reduced absorbance of  $Mg^{2+}$ -EBT complex by chelating  $Mg^{2+}$  ion. (B) ATP dependency in AK-I-190 mediated topoisomerase inhibition was evaluated by varying ATP concentration.
